# Supplementary material for: Incident depression in people with comorbid type 2 diabetes and chronic gastritis/duodenitis: a large-scale cohort study
Source: Research Square preprint supplement (doi:10.21203/rs.3.rs-8141277/v1), 2025-12-08
Supplement: Supplementary file 1 [file c4c8e0aaa5e08a099971b3aa.pdf]

## **Supplementary appendix**

|                                                                                                                                                                                                                                                       |   |
|-------------------------------------------------------------------------------------------------------------------------------------------------------------------------------------------------------------------------------------------------------|---|
| <b>Supplementary Methods 1. Urbanization level</b> .....                                                                                                                                                                                              | 2 |
| <b>Supplementary Methods 2. Modifiable lifestyle factors</b> .....                                                                                                                                                                                    | 2 |
| <b>Supplementary Methods 3. Relative excess risk due to interaction (RERI),<br/>attributable proportion due to interaction (AP) and synergy index (SI)</b> .....                                                                                      | 3 |
| <b>Supplementary Methods 4. Mediation analysis</b> .....                                                                                                                                                                                              | 4 |
| <b>Supplementary Figure 1. Effect of T2D-CGD comorbidity on depression incidence<br/>after step-wise adjusting clinical (model 2), demographical (model 3), and<br/>environmental (model 4) risk factors.</b> .....                                   | 5 |
| <b>Supplementary Figure 2. Effect of T2D-CGD comorbidity on depression incidence<br/>within different follow-up time after adjusting clinical, demographical,<br/>environmental, and modifiable lifestyle risk factors.</b> .....                     | 6 |
| <b>Supplementary Figure 3. Effect of T2D-CGD comorbidity on incident depression in<br/>female and male groups after adjusting clinical, demographical, environmental, and<br/>modifiable lifestyle risk factors.</b> .....                            | 7 |
| <b>Supplementary Figure 4. Results of sensitive analysis in the scenario where only<br/>diagnostic data (ICD-10 code) was used for selecting participants.</b> .....                                                                                  | 8 |
| <b>Supplementary Figure 5. Results of sensitive analysis in the scenario where subjects<br/>who were diagnosed as depressive episodes were included, and those who were only<br/>diagnosed as recurrent depressive disorders were excluded.</b> ..... | 9 |

## **Supplementary Methods 1. Urbanization level**

Based on participants' self-reported residential locations in the UK Biobank, we categorized urbanization levels into four tiers (higher tiers indicating greater urbanization). The distribution of residential types is as follows:

- (1) High Urbanization : Included “England/Wales - Urban – sparse”, "England/Wales - Urban - less sparse", "Scotland - Large Urban Area", and "Scotland - Other Urban Area".
- (2) Moderate Urbanization: Included "England/Wales - Town and Fringe - sparse", "England/Wales - Town and Fringe - less sparse", "Scotland - Accessible Small Town", and "Scotland - Remote Small Town".
- (3) Low Urbanization: Included " England/Wales - Village - sparse ", " England/Wales - Village - less sparse", "Scotland - Very Remote Small Town", and "Scotland - Accessible Rural".
- (4) Very Low/Sparse Urbanization: Included " England/Wales - Hamlet and Isolated dwelling - sparse", "England/Wales - Hamlet and Isolated Dwelling - less sparse", "Scotland - Remote Rural", "Scotland - Very Remote Rural", and "Postcode not linkable".

## **Supplementary Methods 2. Modifiable lifestyle factors**

- (1) Smoking frequency: Never = 0; Occasionally = 1; Almost all day = 3.
- (2) Drinking frequency: Never = 0; Special occasions only = 1; One to three times a month = 2; Once or twice a week = 3; Three or four times a week = 4; daily or almost daily = 5.

- (3) Fruit and vegetable intake: the sum of normalized values (0~1) of daily cooked vegetable intake, salad / raw vegetable intake, fresh fruit intake, dried fruit intake.
- (4) Meat intake: the sum of normalized values (0~1) of daily oily fish intake, non-oily fish intake, processed meat intake, poultry intake, beef intake, lamb/mutton intake, pork intake.
- (5) Bread and cereal intake: the sum of normalized values (0~1) of daily bread intake and cereal intake.

**Supplementary Methods 3. Relative excess risk due to interaction (RERI), attributable proportion due to interaction (AP) and synergy index (SI)**

- (1) RERI quantifies the excess risk from the interaction of two exposures beyond their independent effects. It is calculated as:

$$RERI = RR_{11} - RR_{10} - RR_{01} + 1$$

where  $RR_{11}$  is the relative risk when both exposures are present, and  $RR_{10}$ ,  $RR_{01}$  are the risks when only one exposure is present.  $RERI > 0$  indicates synergistic interaction, while  $RERI < 0$  suggests antagonism.

- (2) AP represents the proportion of disease among doubly exposed individuals attributable to the interaction:

$$AP = RERI / RR_{11}$$

This metric ranges from 0 to 1, with higher values indicating a greater contribution of interaction to the risk.

- (3) SI measures the relative magnitude of synergistic effects compared to independent

effects:

$$SI = \frac{RR_{11} - 1}{((RR_{10} - 1) + (RR_{01} - 1))}$$

An  $SI > 1$  implies synergy, while  $SI = 1$  suggests additivity.

In this study, we established a logistic regression model, incorporating the risk factors and covariates, and used  $\exp(\text{beta value})$  to calculate RR values:

$$\text{Depression status (0,1)} = b_1 * \text{COM} + b_2 * \text{T2D} + b_3 * \text{CGD} + b_4 * \text{T2D duration} + b_5 * \text{CGD duration} + b_6 * \text{Age} + b_7 * \text{Sex} + b_8 * \text{BMI} + e$$

$$RR_{11} = \exp^{(b_1)}; RR_{10} = \exp^{(b_2)}; RR_{01} = \exp^{(b_3)}.$$

#### **Supplementary Methods 4. Mediation analysis**

During UK Biobank's second assessment phase (Instance 2, 2014–2019), brain MRI scans were acquired for 54,060 participants. We defined T2D, CGD, and depression as pre-existing conditions prior to Instance 2.

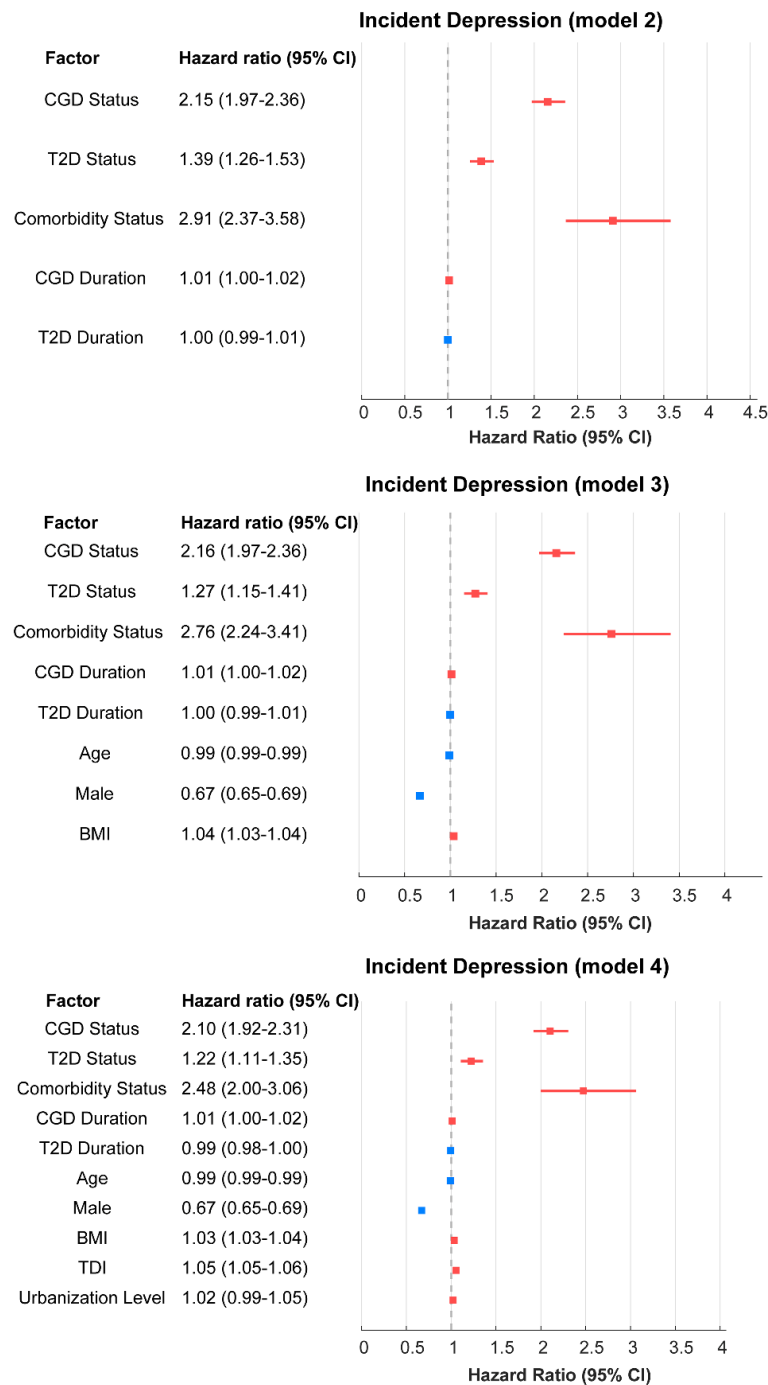

**Supplementary Figure 1.** Effect of T2D-CGD comorbidity on depression incidence after step-wise adjusting clinical (model 2), demographical (model 3), and environmental (model 4) risk factors.

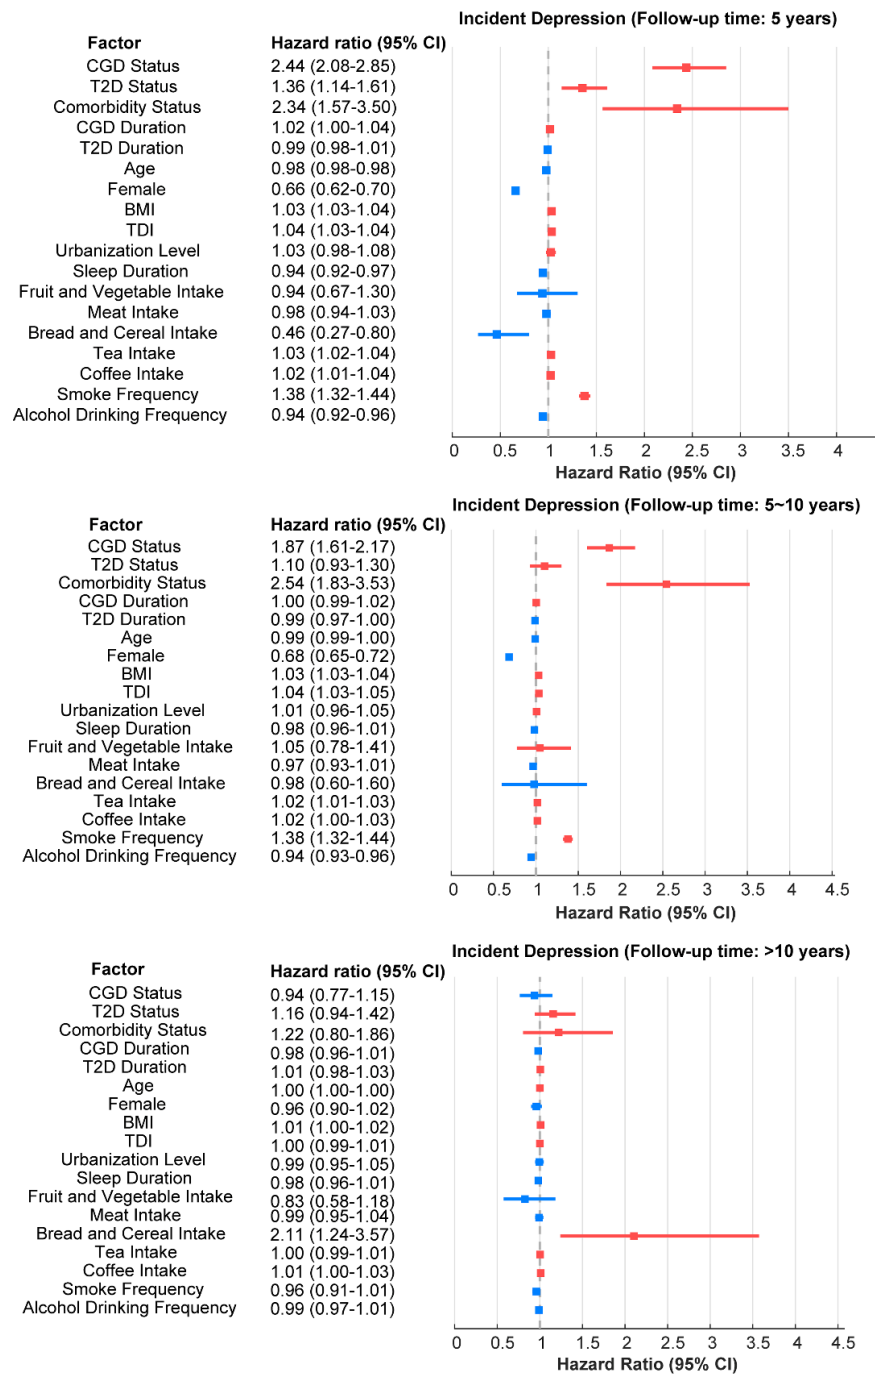

**Supplementary Figure 2.** Effect of T2D-CGD comorbidity on depression incidence within different follow-up time after adjusting clinical, demographical, environmental, and modifiable lifestyle risk factors.

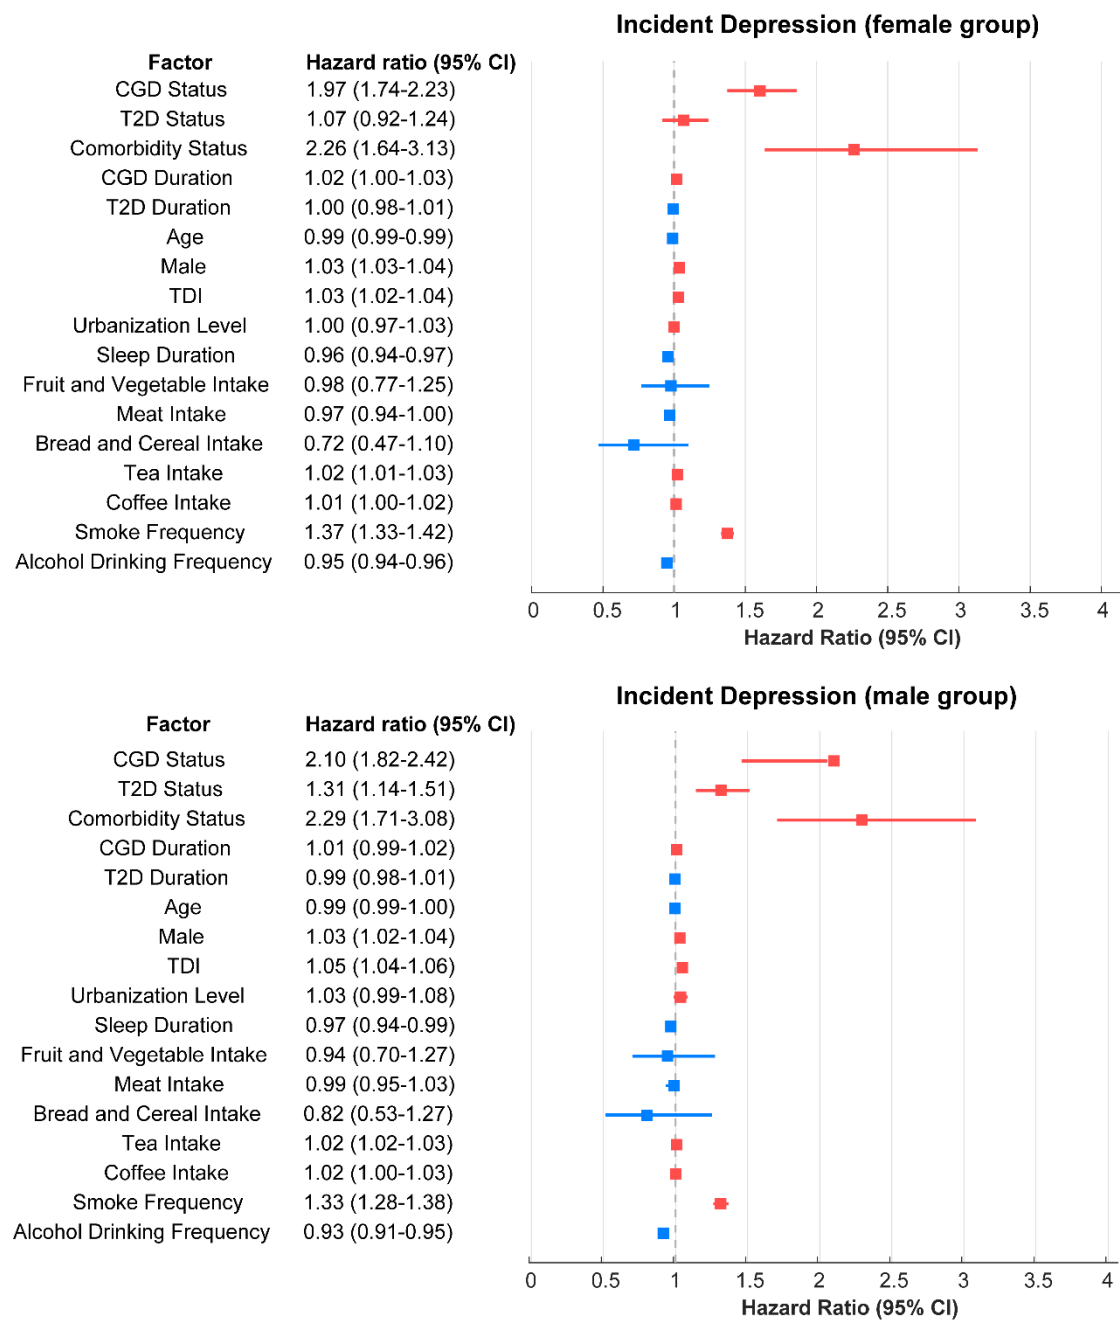

**Supplementary Figure 3.** Effect of T2D-CGD comorbidity on incident depression in female and male groups after adjusting clinical, demographical, environmental, and modifiable lifestyle risk factors.

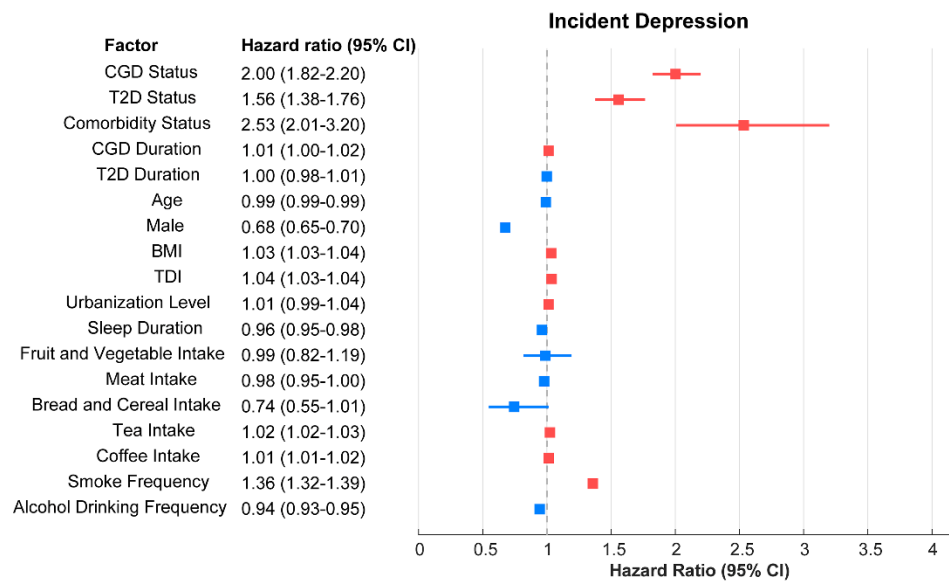

**Supplementary Figure 4.** Results of sensitive analysis in the scenario where only diagnostic data (ICD-10 code) was used for selecting participants.



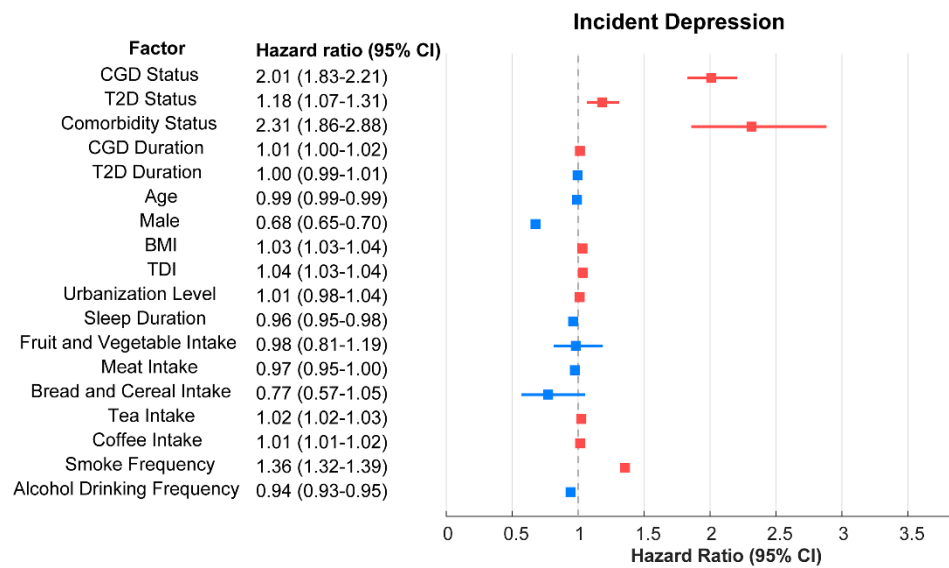

**Supplementary Figure 5.** Results of sensitive analysis in the scenario where subjects who were diagnosed as depressive episodes were included, and those who were only diagnosed as recurrent depressive disorders were excluded.
